1 **Recent and rapid anthropogenic habitat fragmentation increases extinction risk for**  
2 **freshwater biodiversity**

3

4 Chris J. Brauer<sup>1</sup> and Luciano B. Beheregaray<sup>1\*</sup>

5

6 <sup>1</sup> Molecular Ecology Laboratory, College of Science and Engineering, Flinders University,  
7 Adelaide, SA, 5042, Australia

8

9 \*author for correspondence: phone: 61(8) 82015243, email:

10 Luciano.Beheregaray@flinders.edu.au

11

12 Keywords: conservation genomics; eco-evolutionary dynamics; teleost fish; riverscape  
13 genomics; Murray-Darling Basin; threatened biodiversity; genetic rescue; riverine barriers.

14

15

16 **Abstract**

17 Anthropogenic habitat fragmentation is often implicated as driving the current global  
18 extinction crisis, particularly in freshwater ecosystems. The genetic signal of recent  
19 population isolation can however be confounded by the complex spatial arrangement of  
20 dendritic river systems. Consequently, many populations may presently be managed  
21 separately based on an incorrect assumption that they have evolved in isolation. Integrating  
22 landscape genomics data with models of connectivity that account for landscape structure,  
23 we show that the cumulative effects of multiple in-stream barriers have contributed to the  
24 recent decline of a freshwater fish from the Murray-Darling Basin, Australia. In addition,  
25 individual-based eco-evolutionary simulations further demonstrate that contemporary  
26 inferences about population isolation are consistent with the 160-year time frame since  
27 construction of in-stream barriers began in the region. Our findings suggest that the impact  
28 of very recent fragmentation may be often underestimated for freshwater biodiversity. We  
29 argue that proactive conservation measures to reconnect many riverine populations are  
30 urgently needed.

## 31 **Introduction**

32 We are now confronted by the sixth global mass extinction with the current rate of species  
33 losses far exceeding pre-anthropogenic background estimates (Barnosky *et al.* 2011). This  
34 crisis is particularly severe in freshwater ecosystems, which have shown declines of  
35 biodiversity greater than for either terrestrial or marine ecosystems (Darwall *et al.* 2018).  
36 Habitat loss and fragmentation are key factors leading to the genetic and demographic  
37 decline of populations that together threaten species persistence (Fischer & Lindenmayer  
38 2007). Over the last century, close to one million large dams and many millions of smaller in-  
39 stream barriers have been constructed globally (Jackson *et al.* 2001; Liermann *et al.* 2012).  
40 These barriers have had devastating ecological consequences by preventing or restricting  
41 connectivity among populations, leading to higher rates of genetic drift and inbreeding. This,  
42 in turn, can lead to lower fitness due to inbreeding depression and reduced evolutionary  
43 potential due to loss of genetic diversity (Frankham 2005; Keyghobadi 2007). Additionally,  
44 small populations become more vulnerable to extirpation due to stochastic demographic  
45 events (Lande 1993) and, when this occurs on a regional scale, species extinctions are the  
46 inevitable result (Hanski 1998).

47

48 Landscape genetics provides a way to identify how human activities threaten the persistence  
49 of wild populations (Manel & Holderegger 2013). The time lag between environmental  
50 change and any detectable genetic signal resulting from this change can however make it  
51 very difficult to disentangle the effects of historical from contemporary processes (Landguth  
52 *et al.* 2010). This is particularly the case for naturally structured populations such as those  
53 found in dendritic river networks (Coleman *et al.* 2018). The progression from landscape  
54 genetics to landscape genomics has increased both the spatial and temporal resolutions at  
55 which evolutionary processes can be examined, offering a more powerful framework with  
56 which to quantify the effects of very recent disturbance on populations (Allendorf *et al.* 2010;  
57 Grummer *et al.* 2019). Previous landscape genetics studies investigating the impact of in-  
58 stream barriers have often focused on larger, migratory species or assessed only one, or a

59 few large barriers (Faulks *et al.* 2011; Gousskov *et al.* 2016; Torterotot *et al.* 2014). Small-  
60 bodied, but ecologically important species often receive relatively little attention from  
61 conservation managers (Olden *et al.* 2007; Saddler *et al.* 2013) and efforts to improve fish  
62 passage and connectivity are often ineffective for these fishes (Harris *et al.* 2017). The  
63 cumulative impact of many smaller in-stream barriers (e.g. weirs, farm dams and road  
64 crossings) for small-bodied and non-migratory fishes at a basin-wide scale has been the  
65 subject of less research (Coleman *et al.* 2018; Diebel *et al.* 2015).

66

67 In this landscape genomics study, we examine the effects of recent habitat fragmentation for  
68 the southern pygmy perch (*Nannoperca australis*), a threatened small-bodied fish (<80mm)  
69 that recently experienced major demographic declines and local extinctions across the  
70 Murray-Darling Basin (MDB), Australia (Brauer *et al.* 2016; Cole *et al.* 2016; Hammer *et al.*  
71 2013). This species is typical of many native small-bodied fishes in the region and offers a  
72 conservative model for guiding broader conservation strategies, as the impacts of  
73 fragmentation are likely to be more pronounced for larger, migratory species. The MDB has  
74 very few natural in-stream barriers, but it has been heavily modified with more than 10,000  
75 dams, weirs, road crossings, levees and barrages constructed since the late 1850s when  
76 European settlement of this region began (Baumgartner *et al.* 2014). As such, the MDB  
77 provides a unique opportunity to examine the consequences of recent habitat fragmentation  
78 without the confounding influence of prolonged human disturbance over hundreds of years  
79 as is common to many northern hemisphere river basins (e.g. Hansen *et al.* 2014).

80 Environmental factors, including human disturbance are known to influence genetic diversity  
81 for *N. australis* (Brauer *et al.* 2016; Cole *et al.* 2016), however little is known about the  
82 specific role that widespread habitat fragmentation has played in the species recent and  
83 rapid decline. We hypothesize that, after accounting for historical patterns of genetic  
84 structure, genetic differentiation among demes should increase with the number of in-stream  
85 barriers separating them. We also predict that populations most isolated by fragmentation  
86 would exhibit reduced effective population size ( $N_e$ ) and lower levels of genetic diversity.

87 Additionally, we used forward genetic simulations to investigate whether high contemporary  
88 levels of genetic differentiation could have arisen in the relatively short time since the  
89 construction of in-stream barriers began in the MDB. Our results demonstrate that recent  
90 anthropogenic habitat fragmentation has contributed to the loss of genetic diversity and  
91 population isolation observed. They also suggest that proactive conservation measures to  
92 restore connectivity (e.g. environmental flows, habitat restoration) and increase evolutionary  
93 potential (e.g. genetic rescue) are urgently required for this, and potentially many other  
94 poorly dispersing aquatic species.

95

## 96 **Methods**

### 97 *Sampling, ddRAD genotyping and SNP filtering*

98 A total of 263 individuals were sampled from 25 locations, encompassing 13 catchments  
99 across the entire current MDB distribution of *N. australis* (Figure 1; Table 1). Fish were  
100 ethically euthanized using clove oil, frozen in liquid nitrogen in the field, and stored at -70°C  
101 in the Australian Biological Tissues Collection at the South Australian Museum, Adelaide.

102

103 DNA was extracted using the Qiagen DNeasy Blood and Tissue Kit according to the  
104 manufacturers protocol. DNA integrity and purity were assessed using gel electrophoresis  
105 and a NanoDrop 1000 spectrophotometer (Thermo Scientific), respectively. Sequencing  
106 libraries were prepared in-house based on a double-digest restriction-site associated DNA  
107 (ddRAD) library protocol (Peterson *et al.* 2012). Samples were multiplexed with 48 samples  
108 per Illumina HiSeq2000 lane and sequenced as paired-end, 100-bp reads. Raw sequences  
109 were demultiplexed using the *process\_radtags* module of *Stacks* v.1.04 (Catchen *et al.*  
110 2011) before using dDocent v.1.2 (Puritz *et al.* 2014) for *de novo* reference catalogue  
111 assembly and genotyping. The data was then filtered to retain only variants present in at  
112 least 70% of individuals and in 70% of populations, retaining only one biallelic SNP per locus  
113 with a minimum minor allele frequency of 0.05.

114

115 Population structure and other demographic parameters such as effective population size  
116 should be assessed using neutral loci (Allendorf *et al.* 2010; Luikart *et al.* 2003). To define a  
117 putatively neutral dataset,  $F_{ST}$  outlier loci were detected using a Bayesian approach with  
118 BayeScan v.2.1 (Foll & Gaggiotti 2008), and the coalescent-based FDIIST method  
119 (Beaumont & Nichols 1996) in Arlequin v.3.5 (Excoffier & Lischer 2010). BayeScan was run  
120 for 100,000 iterations using prior odds of 10,000. Loci different from zero with a q-value  $<0.1$   
121 were considered outliers. Arlequin was run specifying the hierarchical island model with  
122 50,000 simulations of 100 demes for each of 13 populations (based on the 13 separate  
123 catchments sampled). Loci outside the neutral distribution at a false discovery rate (FDR) of  
124 10% were considered outliers. Loci detected as outliers by either BayeScan or Arlequin were  
125 filtered. The remaining SNPs were examined for departure from expectations of Hardy-  
126 Weinberg equilibrium (HWE) using GenoDive 2.0b27 (Meirmans & Van Tienderen 2004).  
127 Finally, loci out of HWE at a FDR of 10% in more than 50% of populations were removed.  
128 Detailed information concerning library preparation and bioinformatics are described in  
129 Appendix S1.

130

### 131 *Population structure*

132 Pairwise  $F_{ST}$  (Weir & Cockerham 1984) was estimated among sampling sites using  
133 GenoDive (Meirmans & Van Tienderen 2004) with significance assessed using 10,000  
134 permutations. Bayesian clustering analysis of individual genotypes was then performed  
135 using fastStructure (Raj *et al.* 2014). Ten independent runs for each value of  $K$  (1-25) were  
136 completed to ensure consistency and the most likely  $K$  was assessed by comparing the  
137 model complexity that maximised marginal likelihood across replicate runs.

138

### 139 *Anthropogenic isolation of populations*

140 If anthropogenic habitat fragmentation has affected population connectivity and dispersal,  
141 we should expect genetic differentiation to increase in response to the number of in-stream

142 barriers separating populations. To determine if local characteristics of the stream network  
143 (i.e. in-stream barriers and other local scale landscape heterogeneity) better explain  
144 population differentiation than isolation by distance (IBD), we used the StreamTree model of  
145 Kalinowski et al. (2008). Genetic distances among populations were modelled as the sum of  
146 all pairwise genetic distances that mapped to each section of the stream network. This  
147 provides a distance measure that is independent of the length of each stream section and  
148 identifies the reaches that contribute most to restricting gene flow (e.g. due to dendritic  
149 structure, in-stream barriers or other local landscape effects). Model fit was assessed by  
150 plotting the StreamTree fitted distance against observed  $F_{ST}$  and calculating the regression  
151 coefficient of determination ( $R^2$ ). This model was then compared with a model of IBD  
152 calculated using multiple matrix regression with randomisation (MMRR) following the method  
153 of Wang (2013). Pairwise population distances along the river network were calculated with  
154 ArcMap v.10.2 (ESRI 2012). Model significance for the MMRR was assessed using 10,000  
155 random permutations.

156

157 In dendritic river systems, hierarchical network structure and spatial hydroclimatic variation  
158 can also drive patterns of genetic diversity of stream-dwelling organisms (Fourcade *et al.*  
159 2013; Hughes *et al.* 2009; Morrissey & de Kerckhove 2009; Thomaz *et al.* 2016). To  
160 evaluate the relative contributions of anthropogenic habitat fragmentation, natural stream  
161 hierarchy and environmental variation we again used MMRR. In addition to IBD, we used  
162 distance matrices calculated for the number of in-stream barriers, catchment membership,  
163 and a range of environmental variables. The number of in-stream barriers separating sites  
164 was determined using spatial data from the Murray-Darling Basin Weir Information System  
165 (Murray–Darling Basin Authority 2013). To account for the effect of dendritic stream  
166 hierarchy, a binary model matrix describing catchment membership was constructed such  
167 that pairwise comparisons of sites from within the same catchment were assigned a value of  
168 zero, and comparisons among catchments were scored as one. Finally, a subset of 40  
169 hydroclimatic variables were obtained from the Australian hydrological geospatial fabric

170 (Geoscience Australia 2011; Stein *et al.* 2014). These were assigned to one of five  
171 categories describing variation in temperature, precipitation, flow regime, human disturbance  
172 and topography. Variance inflation factor (VIF) analysis was then used to exclude highly  
173 correlated variables using a VIF threshold of 10 (Dyer *et al.* 2010). The remaining variables  
174 were reduced to principal components (PCs) using the `dudi.pca` function in the ADE4 R  
175 package (Dray *et al.* 2016) and Euclidean distance matrices were constructed based on the  
176 PCs with eigenvalues >1 (Yeomans & Golder 1982) retained for each category. All distance  
177 matrices were z-transformed to facilitate direct comparison of partial regression coefficients  
178 (Schielzeth 2010). Each variable was initially tested in an independent univariate MMRR  
179 before significant factors were combined in a multivariate MMRR model with 10,000 random  
180 permutations used to assess significance.

181

### 182 *Habitat fragmentation, genetic diversity and population size*

183 To test the hypothesis that the most isolated populations exhibit reduced genetic diversity  
184 we examined the relationship between population-specific  $F_{ST}$  and expected heterozygosity  
185 ( $H_E$ ). Population-specific  $F_{ST}$  was estimated for each sampling site using the method of Weir  
186 and Hill (2002) and  $H_E$  was calculated using Genodive.

187

188 Effective population size was estimated using the linkage disequilibrium (LD) estimator  
189 implemented in NeEstimator 2.01 (Do *et al.* 2014). This method is based on the assumption  
190 that LD at independently segregating loci in a finite population is a function of genetic drift,  
191 and performs particularly well with a large number of loci and where population sizes are  
192 expected to be small (Waples & Do 2010). In the absence of significant  $F_{ST}$  (Table S1)  
193 Lower Murray sites MID and MUN were considered one population, and these samples were  
194 combined for the  $N_e$  estimates. NeEstimator was run assuming random mating and using a  
195  $P_{crit}$  value of 0.075 following guidelines for small sample sizes suggested by Waples and Do  
196 (2010).

197



198 *Eco-evolutionary simulations*

199 Simulation studies are becoming an increasingly important part of landscape genomics as a  
200 wide range of parameters can be explored for key evolutionary processes such as gene  
201 flow, genetic drift, mutation and selection (Hoban *et al.* 2012). In this case, we used  
202 simulations to examine whether levels of contemporary population isolation are consistent  
203 with having evolved during the time since barrier construction began in the MDB. We  
204 simulated three metapopulation sizes ( $N_e=1000$ ,  $N_e=500$  and  $N_e=100$ ) using SLiM 3.1 (Haller  
205 & Messer 2018). Each simulation was based on a 1D stepping stone population model  
206 assuming equal  $N_e$  for each sub-population while maintaining a constant metapopulation  
207 size to simulate a concurrent increase in the number of barriers, and reduction in habitat  
208 patch size. Each simulation consisted of four 100Kb genomic elements and assumed a  
209 constant mutation rate of  $10^{-7}$  and recombination rate of  $10^{-8}$ . Each simulation was first run  
210 for a burn-in phase of 20,000 generations with a migration rate of 0.5 between adjacent sub-  
211 populations to generate diversity and allow the system to reach migration–drift equilibrium  
212 with  $F_{ST} \sim 0$ . Although this almost certainly underestimates historical population structure  
213 before anthropogenic disturbance, this figure provides a conservative approach by  
214 maximizing the number of generations required to evolve current levels of differentiation.  
215 Following the burn-in, the construction of barriers was simulated by setting the migration rate  
216 among demes to zero for 300 generations. Nine models with an increasing number of  
217 demes (2-10) were simulated for each metapopulation size to examine the effect of  
218 increasing levels of fragmentation (Figure S1-S3), and 100 replicate runs of each scenario  
219 were completed. The `--weir-fst-pop` command of VCFtools (Danecek *et al.* 2011) was used  
220 to calculate  $F_{ST}$  for each replicate. To estimate the time required to reach current levels of  
221 observed population differentiation, assuming a generation time of one year (Humphries  
222 1995), the number of generations (mean of the 100 replicates) needed to achieve  $F_{ST}=0.2$   
223 (mean contemporary  $F_{ST}$  within upper Murray catchments=0.196; Table S1) was plotted  
224 against the number of fragments for each scenario for the three metapopulation models.  
225 Scripts used to perform the simulations and analyses are available on Dryad: TBA.

226

## 227 **Results**

### 228 *Sampling, ddRAD genotyping and SNP filtering*

229 Following demultiplexing, 1,602,903,910 forward and reverse sequencing reads were  
230 recovered. A total of 2,589,251 variant sites were genotyped with dDocent, and after filtering  
231 5,162 high quality SNPs were retained. We removed 873 unique  $F_{ST}$  outlier loci identified by  
232 BayeScan and Arlequin, along with a further 846 loci found to be outside HWE expectations  
233 in >50% of populations. This resulted in a final, putatively neutral dataset of 3,443 SNPs for  
234 the 263 individuals.

235

### 236 *Population structure*

237 High levels of population genetic structure were evident between most demes of *N. australis*,  
238 with pairwise comparisons of  $F_{ST}$  among sampling sites ranging from 0-0.79 (global  $F_{ST}$   
239 =0.48). All pairwise  $F_{ST}$  estimates were significant ( $P<0.003$ ) except between immediately  
240 adjacent lower MDB sites MID and MUN ( $F_{ST} = -0.002$ ,  $P=0.66$ ) (Table S1). Results from  
241 fastStructure indicated population boundaries are strongly correlated with natural riverine  
242 catchment structure, with  $K=13$  identified as the most likely number of populations (Figure  
243 S4). This is consistent with a previous microsatellite study based on a larger sample (578  
244 individuals; 45 localities) that inferred that, until the recent European settlement in the MDB,  
245 well-connected metapopulations of *N. australis* existed within its catchments (Cole *et al.*  
246 2016).

247

### 248 *Anthropogenic isolation of populations*

249 The StreamTree model was used to identify parts of the stream network that contribute more  
250 to  $F_{ST}$  (e.g. restricted dispersal due to barriers or other local environmental conditions).  
251 Results indicated that local characteristics of the stream network better explain  $F_{ST}$  than the  
252 null hypothesis of IBD (i.e. the resistance to dispersal for any given stream section is  
253 determined by its length). Figure 1 provides a visual representation of the relationship

254 between StreamTree fitted distance and the density of artificial in-stream barriers, with  
255 stream sections colour coded according to  $F_{ST}$  as estimated by the model (yellow represents  
256 a modeled local  $F_{ST}$  range of 0-0.01, orange: 0.01-0.05 and red: 0.05-0.38) and the location  
257 of barriers marked with **X**. The StreamTree model was a good fit for the data and was  
258 significantly related to observed  $F_{ST}$  ( $R^2=0.947$ ,  $\beta=0.986$  [0.959- 1.012 95%CI],  $P<2\times 10^{-16}$ )  
259 (Figure 2a), whereas IBD was not significant ( $R^2=0.0139$ ,  $\beta=0.108$  [0.004- 0.212 95%CI],  
260  $P=0.343$ ) (Figure 2b). Although there was significant IBD within catchment groups (i.e. the  
261 first cluster in Figure 2b,  $R^2=0.730$ ,  $\beta=0.0016$  [0.001- 0.002 95%CI],  $P=6.54\times 10^{-8}$ ), IBD was  
262 not significant in models across the whole basin, in contrast to models of stream hierarchy  
263 and barriers (see below). In addition, even when comparisons were limited to sites within-  
264 catchments, the number of barriers still provided a better model than IBD ( $R^2=0.81$  vs. 0.73,  
265 respectively; Figure S5).

266

267 Following VIF analyses, 19 environmental variables from the five categories were retained.  
268 The first two PCs for temperature, flow and topographic variables scored eigenvalues  $>1$   
269 while only one component each for the precipitation and human disturbance PCAs scored  
270 an eigenvalue  $>1$ , so individual variables rather than PCs for these categories were retained.  
271 This resulted in a final list of six hydroclimatic PCs and five individual precipitation and  
272 disturbance variables (Table S2).

273

274 Assessment of the relative influence of anthropogenic habitat fragmentation, natural stream  
275 hierarchy and environmental heterogeneity indicated that population structure is driven by a  
276 combination of the effects of stream network hierarchy and the number of in-stream barriers.  
277 Univariate regressions revealed catchment membership ( $R^2=0.170$ ,  $\beta=0.449$  [0.336- 0.562  
278 95%CI],  $P<0.0001$ ) and the number of in-stream barriers separating sites ( $R^2=0.322$ ,  
279  $\beta=0.548$  [0.458- 0.639 95%CI],  $P<0.0001$ ) were both good predictors of population  
280 differentiation, while there was no evidence for isolation by environment (Table 2). Including

281 both significant predictors (catchment membership and number of barriers) in a multivariate  
282 model improved model fit with catchment membership, and the number of barriers each  
283 accounting for 61% and 39% of the explained variation, respectively ( $R^2=0.358$ ,  
284  $\beta_{\text{catchment}}=0.725$  [0.374- 1.076 95%CI],  $\beta_{\text{barriers}}=0.462$  [0.365- 0.560 95%CI],  $P<0.0001$ )  
285 (Figure 3; Table 2).

286

### 287 *Habitat fragmentation, genetic diversity and population size*

288 Genetic variation varied across the MDB with an average  $H_E$  of 0.161 (0.057-0.263). There  
289 was a sharp contrast between regions with average  $H_E$  of 0.253 for sites in the more  
290 connected Lower Murray wetlands, compared to 0.143 for sites in the highly fragmented  
291 upper reaches (Table 1). A strong negative relationship between population-specific  $F_{ST}$  and  
292  $H_E$  was also evident ( $R^2=0.737$ ,  $\beta=-2.05$  [-2.58- -1.52 95%CI],  $P<1\times 10^{-7}$ ) with the most  
293 isolated populations also harbouring the least genetic variation (Figure S6; Table 1).  
294 Effective population size estimates were generally low, averaging 194.75 for Lower Murray  
295 sites and 112.26 for sites in the upper reaches, with many of the latter  $<100$  (Table 1).

296

### 297 *Eco-evolutionary simulations*

298 The simulations demonstrated that contemporary population differentiation among sites  
299 within catchments (mean within headwater catchments  $F_{ST}=0.196$ ) could have evolved from  
300 a more connected system within the time since the construction of in-stream barriers began  
301 ~160 generations ago (Figure 4; Table S3; Appendix S3-S5). For metapopulations with an  
302  $N_e$  of 1000,  $F_{ST}$  approached 0.2 in less than 160 generations with only three barriers  
303 fragmenting the population. Models assuming  $N_e=500$  and  $N_e=100$  indicated that  
304 substantially fewer generations following fragmentation were required to reach contemporary  
305 levels of  $F_{ST}$ . At  $N_e=500$ ,  $F_{ST}=0.2$  occurred after 124 generations with one barrier and after  
306 just 19 generations with nine barriers (Figure 4; Table S3). For smaller populations of

307  $N_e=100$  contemporary levels of differentiation evolved within 24 generations with just one  
308 barrier (Figure 4; Table S3).

309

## 310 **Discussion**

311 Habitat fragmentation is a key process implicated in the current and unprecedented  
312 worldwide loss of freshwater biodiversity (Fischer & Lindenmayer 2007). Determining the  
313 contribution of recent human activities to the decline of riverine species is however  
314 challenging, as the genetic signal of recent disturbance can be confounded by historical  
315 patterns of dispersal shaped by hydrological network structure (Brauer *et al.* 2018; Coleman  
316 *et al.* 2018; Landguth *et al.* 2010). For *N. australis*, populations most isolated by recent  
317 habitat fragmentation also exhibited reduced genetic diversity and increased population  
318 differentiation, and this signal remained strong after accounting for the historical effects of  
319 dendritic stream hierarchy. Contemporary  $F_{ST}$  estimates were within the expected range  
320 obtained by simulating the recent construction of in-stream barriers in the MDB, supporting  
321 the hypothesis that anthropogenic habitat fragmentation has impacted populations since  
322 European settlement of the region. Previous work based on coalescent analyses of  
323 microsatellite DNA datasets has demonstrated that historical population sizes of *N. australis*  
324 were much larger before European settlement (Attard *et al.* 2016), and that populations  
325 across the MDB were also more connected until that time (Cole *et al.* 2016). These studies  
326 support our findings and the hypothesis that the low genetic diversity, small  $N_e$  and high  $F_{ST}$   
327 observed for contemporary populations likely reflects the combined impact of both historical  
328 and recent processes, rather than being due solely to natural demographic variability over  
329 longer evolutionary time scales. In addition, several populations sampled for this study have  
330 subsequently suffered local extirpation during prolonged drought, and the small size of most  
331 remnant populations indicate they are at high risk of extinction.

332

333 Since European settlement, hydrology in the MDB has been increasingly modified due to  
334 urbanisation and irrigation (Leblanc *et al.* 2012). These changes have included the

335 construction of thousands of barriers to fish passage across the basin (Baumgartner *et al.*  
336 2014) and it is now considered one of Australia's most fragmented and degraded  
337 ecosystems (Davies *et al.* 2010; Kingsford 2000). The focus of most barrier mitigation  
338 actions in the MDB to date has been on restoring passage across larger dams along the  
339 main river channel (Barrett & Mallen-Cooper 2006). Although some fishways have been  
340 designed to facilitate movement of smaller fish, they have predominantly targeted large-  
341 bodied, highly mobile species (Baumgartner *et al.* 2014). Furthermore, the spatial scale of  
342 dispersal for many small-bodied MDB fishes often restricts their movements to headwater  
343 streams and wetlands away from the main channel (Harris *et al.* 2017). Habitat loss and  
344 fragmentation associated with the thousands of smaller barriers in headwater streams have  
345 therefore likely contributed to the widespread decline of many smaller and more sedentary  
346 MDB fishes, including *N. australis* (Brauer *et al.* 2018; Cole *et al.* 2016; Hammer *et al.* 2013;  
347 Huey *et al.* 2017). It is perhaps surprising then, that there have been relatively few studies  
348 explicitly testing the genetic effects of anthropogenic fragmentation on small-bodied fishes in  
349 the MDB. One recent example in the neighbouring Yarra River catchment however  
350 combined a large empirical dataset with spatially explicit simulations to examine the role of  
351 artificial barriers in driving local-scale patterns of genetic variation for river blackfish  
352 (*Gadopsis marmoratus*), a small and sedentary species also found in the MDB (Coleman *et*  
353 *al.* 2018). Based on eight microsatellite loci, genetic diversity was found to be lower for  
354 populations above barriers in small streams, with several isolated populations also exhibiting  
355 signs of inbreeding. In addition, their simulations demonstrated that power to detect recent  
356 impacts of barriers could be improved by increasing the number of loci used, highlighting the  
357 benefit of modern genomic data for conservation genetics.

358

359 An unprecedented severe and prolonged drought between 1997 and 2010 caused  
360 catastrophic loss of habitat and local extirpation for some *N. australis* populations,  
361 particularly in the lower Murray (Hammer *et al.* 2013; Wedderburn *et al.* 2012). In response  
362 an emergency conservation-breeding and restoration program was implemented in the lower

363 MDB (Attard *et al.* 2016; Hammer *et al.* 2013), and additional breeding and translocations  
364 among several headwater populations have been initiated (P. Rose, *personal*  
365 *communication*). As the impacts of climate change intensify, proactive conservation  
366 management interventions such as those already underway for *N. australis*, will be  
367 increasingly considered for other species inhabiting the MDB and fragmented freshwater  
368 ecosystems elsewhere in the world. Indeed, a recent study incorporating physiological and  
369 functional traits with species distribution models for 23 fish species predicted severe  
370 declines in taxonomic and functional diversity of MDB fish communities in the coming  
371 decades due to climate change (de Oliveira *et al.* 2019). Managing regulated river systems  
372 to provide environmental flows, habitat restoration and other measures to re-establish  
373 connectivity among habitat patches (e.g. installation of fishways) have the potential to  
374 address some impacts and should continue to be priorities for conservation and water  
375 management. Nonetheless, these long-term, landscape-scale measures are often  
376 constrained by competing interests related to political and socio-economic issues (Davis *et*  
377 *al.* 2015).

378  
379 Additionally, many species may be already depleted to the point where improved  
380 environmental conditions alone will not be sufficient to facilitate recovery. In this case,  
381 genetic rescue offers a potential solution for a broad range of threatened taxa (Ralls *et al.*  
382 2018; Whiteley *et al.* 2015). Despite strong evidence supporting the benefits of genetic  
383 rescue for fragmented populations however, conservation managers are often reluctant to  
384 adopt these measures (Frankham 2015). We suggest that the impacts of recent habitat  
385 fragmentation may have been underappreciated for many species, and that estimates of  
386 population structure solely attributed to historical evolutionary processes have potentially led  
387 to management frameworks that actually reinforce fragmentation and isolation at the  
388 expense of species-level genetic variation (*sensu* Coleman *et al.* 2013). There is also  
389 increasing evidence that natural selection can influence the evolutionary trajectory of small  
390 and fragmented populations (Brauer *et al.* 2017; Fraser 2017; Wood *et al.* 2016). Critically

391 for conservation, this indicates that adaptive divergence of small populations can occur  
392 quickly following fragmentation (Brauer *et al.* 2017), and that even very recently isolated  
393 populations may harbor novel adaptive diversity. It is therefore important to build  
394 evolutionary resilience by facilitating genetic exchange among isolated populations to  
395 restore natural evolutionary processes and maintain species-level genetic variation,  
396 potentially valuable under a range of future selection regimes (Webster *et al.* 2017; Weeks  
397 *et al.* 2016).

398

399 There is a global biodiversity crisis unfolding in freshwater ecosystems with aquatic  
400 vertebrate populations declining by 80% over the last 50 years (Darwall *et al.* 2018).  
401 Restoring functional connectivity for whole aquatic communities across entire river basins  
402 via traditional mitigation approaches is simply not feasible within the time frame required to  
403 enable many currently threatened species to persist. There is also now strong empirical  
404 evidence that several long-established beliefs central to prevailing conservation practices  
405 are overly cautious, and that the current local-is-best approach increases the prospect of  
406 managing species to extinction (Frankham *et al.* 2017; Pavlova *et al.* 2017; Weeks *et al.*  
407 2016). Given widespread fragmentation, habitat loss, and the ongoing global decline of  
408 freshwater biodiversity, a rapid paradigm shift is needed to empower conservation  
409 practitioners to take action before a threatened species demographic situation becomes  
410 critical. There are risks associated with any proactive management intervention such as  
411 translocation or genetic rescue. These risks however need to be weighed against the ever-  
412 increasing risk of doing nothing.

413



414 **Acknowledgements**

415 We thank the many people who helped with fieldwork, especially Peter Unmack, Michael  
416 Hammer and Mark Adams for curating samples. Minami Sasaki and Jonathan Sandoval-  
417 Castillo provided valuable assistance with laboratory and bioinformatics, respectively.  
418 Collections were obtained under permits from various state fisheries agencies and research  
419 is under Flinders University Animal Welfare Committee approval E313. Financial support  
420 was provided by the Australian Research Council via a Future Fellowship project to Luciano  
421 Beheregaray (FT130101068) and the AJ & IM Naylor PhD scholarship to Chris Brauer.

422

423 **Data Archiving Statement**

424 Reference sequences, SNP genotypes, sample coordinates and environmental data used in  
425 analyses are available on Dryad: TBA

426

427 **References**

- 428
- 429 Allendorf FW, Hohenlohe PA, Luikart G (2010) Genomics and the future of conservation  
430 genetics. *Nature Reviews: Genetics* **11**, 697–709.
- 431 Attard C, Möller L, Sasaki M, *et al.* (2016) A novel holistic framework for genetic-based  
432 captive-breeding and reintroduction programs. *Conservation Biology* **30**, 1060–1069.
- 433 Barnosky AD, Matzke N, Tomiya S, *et al.* (2011) Has the Earth's sixth mass extinction  
434 already arrived? *Nature* **471**, 51–57.
- 435 Barrett J, Mallen-Cooper M (2006) The Murray River's 'Sea to Hume Dam' fish passage  
436 program: Progress to date and lessons learned. *Ecological Management &*  
437 *Restoration* **7**, 173–183.
- 438 Baumgartner L, Zampatti B, Jones M, Stuart I, Mallen-Cooper M (2014) Fish passage in the  
439 Murray-Darling Basin, Australia: Not just an upstream battle. *Ecological Management*  
440 *& Restoration* **15**, 28–39.
- 441 Beaumont MA, Nichols RA (1996) Evaluating loci for use in the genetic analysis of  
442 population structure. *Proceedings of the Royal Society of London. Series B:*  
443 *Biological Sciences* **263**, 1619–1626.
- 444 Brauer C, Unmack PJ, Smith S, Bernatchez L, Beheregaray LB (2018) On the roles of  
445 landscape heterogeneity and environmental variation in determining population  
446 genomic structure in a dendritic system. *Molecular Ecology* **27**, 3484–3497.
- 447 Brauer CJ, Hammer M, Beheregaray L (2016) Riverscape genomics of a threatened fish  
448 across a hydroclimatically heterogeneous river basin. *Molecular Ecology* **25**, 5093–  
449 5113.
- 450 Brauer CJ, Unmack PJ, Beheregaray LB (2017) Comparative ecological transcriptomics and  
451 the contribution of gene expression to the evolutionary potential of a threatened fish.  
452 *Molecular Ecology* **26**, 6841–6856.
- 453 Catchen JM, Amores A, Hohenlohe P, Cresko W, Postlethwait JH (2011) Stacks: building  
454 and genotyping loci de novo from short-read sequences. *G3: Genes, Genomes,*  
455 *Genetics* **1**, 171–182.
- 456 Cole T, Hammer M, Unmack P, *et al.* (2016) Range-wide fragmentation in a threatened fish  
457 associated with post-European settlement modification in the Murray-Darling Basin,  
458 Australia. *Conservation Genetics* **17**, 1377–1391.
- 459 Coleman RA, Gauffre B, Pavlova A, *et al.* (2018) Artificial barriers prevent genetic recovery  
460 of small isolated populations of a low-mobility freshwater fish. *Heredity* **120**, 515–  
461 532.
- 462 Coleman RA, Weeks AR, Hoffmann AA (2013) Balancing genetic uniqueness and genetic  
463 variation in determining conservation and translocation strategies: a comprehensive  
464 case study of threatened dwarf galaxias, *Galaxiella pusilla* (Mack) (Pisces:  
465 Galaxiidae). *Molecular Ecology* **22**, 1820–1835.
- 466 Danecek P, Auton A, Abecasis G, *et al.* (2011) The variant call format and VCFtools.  
467 *Bioinformatics* **27**, 2156–2158.
- 468 Darwall W, Bremerich V, De Wever A, *et al.* (2018) The Alliance for Freshwater Life: A  
469 global call to unite efforts for freshwater biodiversity science and conservation.  
470 *Aquatic Conservation: Marine and Freshwater Ecosystems* **28**, 1015–1022.
- 471 Davies P, Harris J, Hillman T, Walker K (2010) The sustainable rivers audit: assessing river  
472 ecosystem health in the Murray–Darling Basin, Australia. *Marine and Freshwater*  
473 *Research* **61**, 764–777.
- 474 Davis J, O'Grady AP, Dale A, *et al.* (2015) When trends intersect: the challenge of protecting  
475 freshwater ecosystems under multiple land use and hydrological intensification  
476 scenarios. *Science of the Total Environment* **534**, 65–78.
- 477 de Oliveira AG, Bailly D, Cassemiro FA, *et al.* (2019) Coupling environment and physiology  
478 to predict effects of climate change on the taxonomic and functional diversity of fish  
479 assemblages in the Murray-Darling Basin, Australia. *PLoS ONE* **14**.

- 480 Diebel M, Fedora M, Cogswell S, O'Hanley J (2015) Effects of road crossings on habitat  
481 connectivity for stream - resident fish. *River Research and Applications* **31**, 1251-  
482 1261.
- 483 Do C, Waples RS, Peel D, *et al.* (2014) NeEstimator v2: re-implementation of software for  
484 the estimation of contemporary effective population size ( $N_e$ ) from genetic data.  
485 *Molecular Ecology Resources* **14**, 209–214.
- 486 Dray S, Legendre P, Blanchet FG (2016) packfor: Forward Selection with permutation R  
487 package version 0.0-8/r136. <https://R-Forge.R-project.org/projects/sedar/>.
- 488 Dyer RJ, Nason JD, Garrick RC (2010) Landscape modelling of gene flow: improved power  
489 using conditional genetic distance derived from the topology of population networks.  
490 *Molecular Ecology* **19**, 3746–3759.
- 491 ESRI (2012) ArcMap 10.1. Environmental Systems Research Institute, Inc., Redlands.
- 492 Excoffier L, Lischer HEL (2010) Arlequin suite ver 3.5: a new series of programs to perform  
493 population genetics analyses under Linux and Windows. *Molecular Ecology*  
494 *Resources* **10**, 564–567.
- 495 Faulks LK, Gilligan DM, Beheregaray LB (2011) The role of anthropogenic vs. natural in-  
496 stream structures in determining connectivity and genetic diversity in an endangered  
497 freshwater fish, Macquarie perch (*Macquaria australasica*). *Evolutionary Applications*  
498 **4**, 589–601.
- 499 Fischer J, Lindenmayer DB (2007) Landscape modification and habitat fragmentation: a  
500 synthesis. *Global Ecology and Biogeography* **16**, 265–280.
- 501 Foll M, Gaggiotti O (2008) A genome-scan method to identify selected loci appropriate for  
502 both dominant and codominant markers: a bayesian perspective. *Genetics* **180**, 977–  
503 993.
- 504 Fourcade Y, Chaput-Bardy A, Secondi J, Fleurant C, Lemaire C (2013) Is local selection so  
505 widespread in river organisms? Fractal geometry of river networks leads to high bias  
506 in outlier detection. *Molecular Ecology* **22**, 2065–2073.
- 507 Frankham R (2005) Genetics and extinction. *Biological Conservation* **126**, 131–140.
- 508 Frankham R (2015) Genetic rescue of small inbred populations: meta-analysis reveals large  
509 and consistent benefits of gene flow. *Molecular Ecology* **24**, 2610–2618.
- 510 Frankham R, Ballou JD, Ralls K, *et al.* (2017) *Genetic management of fragmented animal*  
511 *and plant populations* Oxford University Press.
- 512 Fraser DJ (2017) Genetic diversity of small populations: Not always “doom and gloom”?  
513 *Molecular Ecology* **26**, 6499–6501.
- 514 Geoscience Australia (2011) *National surface water information*.  
515 <http://www.ga.gov.au/topographic-mapping/national-surface-water-information.html>
- 516 Gouskov A, Reyes M, Wirthner-Bitterlin L, Vorburger C (2016) Fish population genetic  
517 structure shaped by hydroelectric power plants in the upper Rhine catchment.  
518 *Evolutionary Applications* **9**, 394–408.
- 519 Grummer JA, Beheregaray LB, Bernatchez L, *et al.* (2019) Aquatic Landscape Genomics  
520 and Environmental Effects on Genetic Variation. *Trends in Ecology & Evolution*.
- 521 Haller BC, Messer PW (2018) SLiM 3: Forward genetic simulations beyond the Wright–  
522 Fisher model. *Molecular Biology and Evolution*.
- 523 Hammer MP, Bice CM, Hall A, *et al.* (2013) Freshwater fish conservation in the face of  
524 critical water shortages in the southern Murray–Darling Basin, Australia. *Marine and*  
525 *Freshwater Research* **64**, 807–821.
- 526 Hansen MM, Limborg MT, Ferchaud A-L, Pujolar J-M (2014) The effects of Medieval dams  
527 on genetic divergence and demographic history in brown trout populations. *BMC*  
528 *Evolutionary Biology* **14**, 1.
- 529 Hanski I (1998) Metapopulation dynamics. *Nature* **396**, 41–49.
- 530 Harris JH, Kingsford RT, Peirson W, Baumgartner LJ (2017) Mitigating the effects of barriers  
531 to freshwater fish migrations: the Australian experience. *Marine and Freshwater*  
532 *Research* **68**, 614–628.
- 533 Hoban S, Bertorelle G, Gaggiotti OE (2012) Computer simulations: tools for population and  
534 evolutionary genetics. *Nature Reviews: Genetics* **13**, 110–122.

- 535 Huey JA, Balcombe SR, Real KM, Sternberg D, Hughes JM (2017) Genetic structure and  
536 effective population size of the most northern population of the Australian river  
537 blackfish, *Gadopsis marmoratus* (Richardson 1848): implications for long-term  
538 population viability. *Freshwater Science* **36**, 113–123.
- 539 Hughes JM, Schmidt DJ, Finn DS (2009) Genes in streams: using DNA to understand the  
540 movement of freshwater fauna and their riverine habitat. *Bioscience* **59**, 573–583.
- 541 Humphries P (1995) Life history, food and habitat of southern pygmy perch, *Nannoperca*  
542 *australis*, in the Macquarie River, Tasmania. *Marine and Freshwater Research* **46**,  
543 1159–1169.
- 544 Jackson RB, Carpenter SR, Dahm CN, *et al.* (2001) Water in a changing world. *Ecological*  
545 *Applications* **11**, 1027–1045.
- 546 Kalinowski ST, Meeuwig MH, Narum SR, Taper ML (2008) Stream trees: a statistical  
547 method for mapping genetic differences between populations of freshwater  
548 organisms to the sections of streams that connect them. *Canadian Journal of*  
549 *Fisheries and Aquatic Sciences* **65**, 2752–2760.
- 550 Keyghobadi N (2007) The genetic implications of habitat fragmentation for animals.  
551 *Canadian Journal of Zoology* **85**, 1049–1064.
- 552 Kingsford RT (2000) Ecological impacts of dams, water diversions and river management on  
553 floodplain wetlands in Australia. *Austral Ecology* **25**, 109–127.
- 554 Lande R (1993) Risks of population extinction from demographic and environmental  
555 stochasticity and random catastrophes. *American Naturalist*, 911–927.
- 556 Landguth EL, Cushman SA, Schwartz MK, *et al.* (2010) Quantifying the lag time to detect  
557 barriers in landscape genetics. *Molecular Ecology* **19**, 4179–4191.
- 558 Leblanc M, Tweed S, Van Dijk A, Timbal B (2012) A review of historic and future  
559 hydrological changes in the Murray-Darling Basin. *Global and Planetary Change* **80–**  
560 **81**, 226–246.
- 561 Liermann CR, Nilsson C, Robertson J, Ng RY (2012) Implications of dam obstruction for  
562 global freshwater fish diversity. *Bioscience* **62**, 539–548.
- 563 Luikart G, England PR, Tallmon D, Jordan S, Taberlet P (2003) The power and promise of  
564 population genomics: from genotyping to genome typing. *Nature Reviews: Genetics*  
565 **4**, 981–994.
- 566 Manel S, Holderegger R (2013) Ten years of landscape genetics. *Trends in Ecology &*  
567 *Evolution* **28**, 614–621.
- 568 Meirmans PG, Van Tienderen PH (2004) GenoType and GenoDive: two programs for the  
569 analysis of genetic diversity of asexual organisms. *Molecular Ecology Notes* **4**, 792–  
570 794.
- 571 Morrissey MB, de Kerckhove DT (2009) The maintenance of genetic variation due to  
572 asymmetric gene flow in dendritic metapopulations. *The American Naturalist* **174**,  
573 875–889.
- 574 Murray–Darling Basin Authority (2013) *Murray-Darling Basin Weir Information System*.  
575 <http://asdd.ga.gov.au/asdd/profileinfo/anzlic-jurisdic.xml#anzlic-jurisdic>
- 576 Olden JD, Hogan ZS, Zanden MJV (2007) Small fish, big fish, red fish, blue fish: size-biased  
577 extinction risk of the world's freshwater and marine fishes. *Global Ecology and*  
578 *Biogeography* **16**, 694–701.
- 579 Pavlova A, Beheregaray LB, Coleman R, *et al.* (2017) Severe consequences of habitat  
580 fragmentation on genetic diversity of an endangered Australian freshwater fish: a call  
581 for assisted gene flow. *Evolutionary Applications* **10**, 531–550.
- 582 Peterson B, Weber J, Kay E, Fisher H, Hoekstra H (2012) Double digest RADseq: an  
583 inexpensive method for de novo SNP discovery and genotyping in model and non-  
584 model species. *PLoS ONE* **7**, e37135.
- 585 Puritz JB, Hollenbeck CM, Gold JR (2014) dDocent: a RADseq, variant-calling pipeline  
586 designed for population genomics of non-model organisms. *PeerJ* **2**, e431.
- 587 Raj A, Stephens M, Pritchard JK (2014) fastSTRUCTURE: variational inference of  
588 population structure in large SNP data sets. *Genetics* **197**, 573–589.

- 589 Ralls K, Ballou JD, Dudash MR, *et al.* (2018) Call for a paradigm shift in the genetic  
590 management of fragmented populations. *Conservation Letters* **11**, e12412.
- 591 Saddler S, Koehn JD, Hammer MP (2013) Let's not forget the small fishes – conservation of  
592 two threatened species of pygmy perch in south-eastern Australia. *Marine and*  
593 *Freshwater Research* **64**, 874–886.
- 594 Schielzeth H (2010) Simple means to improve the interpretability of regression coefficients.  
595 *Methods in Ecology and Evolution* **1**, 103–113.
- 596 Stein J, Hutchinson M, Stein J (2014) A new stream and nested catchment framework for  
597 Australia. *Hydrology and Earth System Sciences* **18**, 1917–1933.
- 598 Thomaz AT, Christie MR, Knowles LL (2016) The architecture of river networks can drive the  
599 evolutionary dynamics of aquatic populations. *Evolution* **70**, 731–739.
- 600 Torterotot J-B, Perrier C, Bergeron NE, Bernatchez L (2014) Influence of forest road culverts  
601 and waterfalls on the fine-scale distribution of brook trout genetic diversity in a boreal  
602 watershed. *Transactions of the American Fisheries Society* **143**, 1577–1591.
- 603 Wang IJ (2013) Examining the full effects of landscape heterogeneity on spatial genetic  
604 variation: a multiple matrix regression approach for quantifying geographic and  
605 ecological isolation. *Evolution* **67**, 3403–3411.
- 606 Waples RS, Do C (2010) Linkage disequilibrium estimates of contemporary  $N_e$  using highly  
607 variable genetic markers: a largely untapped resource for applied conservation and  
608 evolution. *Evolutionary Applications* **3**, 244–262.
- 609 Webster MS, Colton MA, Darling ES, *et al.* (2017) Who should pick the winners of climate  
610 change? *Trends in Ecology & Evolution*.
- 611 Wedderburn S, Hammer M, Bice C (2012) Shifts in small-bodied fish assemblages resulting  
612 from drought-induced water level recession in terminating lakes of the Murray-Darling  
613 Basin, Australia. *Hydrobiologia* **691**, 35–46.
- 614 Weeks AR, Stoklosa J, Hoffmann AA (2016) Conservation of genetic uniqueness of  
615 populations may increase extinction likelihood of endangered species: the case of  
616 Australian mammals. *Frontiers in Zoology* **13**, 1.
- 617 Weir BS, Cockerham CC (1984) Estimating F-statistics for the analysis of population  
618 structure. *Evolution* **38**, 1358–1370.
- 619 Weir BS, Hill W (2002) Estimating F-statistics. *Annual Review of Genetics* **36**, 721–750.
- 620 Whiteley AR, Fitzpatrick SW, Funk WC, Tallmon DA (2015) Genetic rescue to the rescue.  
621 *Trends in Ecology & Evolution* **30**, 42–49.
- 622 Wood JLA, Yates MC, Fraser DJ (2016) Are heritability and selection related to population  
623 size in nature? Meta-analysis and conservation implications. *Evolutionary*  
624 *Applications* **9**, 640–657.
- 625 Yeomans KA, Golder PA (1982) The Guttman-Kaiser criterion as a predictor of the number  
626 of common factors. *The Statistician* **31**, 221–229.
- 627

628 Table 1. Sample size (N), expected heterozygosity ( $H_E$ ), population-specific  $F_{ST}$  (Weir & Hill  
 629 2002) and effective population size estimates ( $N_e$ ). Lowland wetland sites referred to as  
 630 Lower Murray in the text are indicated in bold. \*MID and MUN samples combined for  $N_e$   
 631 estimation.

| Catchment                | Site       | N         | $H_E$        | $F_{ST}$     | $N_e$ (95% CI)              |
|--------------------------|------------|-----------|--------------|--------------|-----------------------------|
| <b>Tookayerta (TOO)</b>  | <b>TBA</b> | <b>7</b>  | <b>0.227</b> | <b>0.059</b> | $\infty$                    |
| <b>Lower Lakes (LMR)</b> | <b>ALE</b> | <b>10</b> | <b>0.263</b> | <b>0.066</b> | <b>198.6 (158.6–264.9)</b>  |
|                          | <b>MID</b> | <b>7</b>  | <b>0.262</b> | <b>0.092</b> | <b>190.9 (163.3–229.4)*</b> |
|                          | <b>MUN</b> | <b>6</b>  | <b>0.260</b> | <b>0.034</b> |                             |
| Angas (ANG)              | MCM        | 9         | 0.097        | 0.555        | 76.3 (61.0–101.3)           |
| Avoca (AVO)              | MIC        | 11        | 0.114        | 0.409        | 13.7 (13.2–14.4)            |
| Campaspe (CAM)           | JHA        | 12        | 0.091        | 0.364        | 393.8 (184.0– $\infty$ )    |
| Upper Goulburn (UGO)     | MER        | 17        | 0.075        | 0.467        | 70.4 (61.4–82.2)            |
|                          | TRA        | 10        | 0.075        | 0.433        | 50.7 (41.2–65.3)            |
|                          | YEA        | 8         | 0.087        | 0.364        | 260.4 (111.1– $\infty$ )    |
| Lower Goulburn (LGO)     | PRA        | 9         | 0.243        | 0.179        | 114.9 (98.4–137.9)          |
|                          | SEV        | 11        | 0.218        | 0.119        | 54.8 (50.8–59.4)            |
| Broken (BRO)             | BEN        | 10        | 0.236        | 0.159        | 117.2 (101.7–138.2)         |
|                          | SAM        | 10        | 0.234        | 0.188        | 124.7 (108.0–147.2)         |
|                          | LIM        | 18        | 0.118        | 0.337        | 99.1 (88.5–112.5)           |
| Ovens (OVE)              | KIN        | 16        | 0.104        | 0.297        | 69.9 (62.1–79.8)            |
|                          | HAP        | 9         | 0.114        | 0.369        | $\infty$                    |
|                          | MEA        | 8         | 0.158        | 0.245        | 53.4 (45.7–64)              |
| Kiewa (KIE)              | GAP        | 12        | 0.168        | 0.305        | 122.5 (105.3–146.2)         |
| Albury (ALB)             | ALB        | 12        | 0.226        | 0.299        | 305.4 (241.8–413.4)         |
| Mitta Mitta (MIT)        | SPR        | 10        | 0.152        | 0.262        | 98.1 (80.5–125)             |
|                          | GLE        | 10        | 0.143        | 0.408        | 51.1 (46.1–57.2)            |
|                          | TAL        | 7         | 0.164        | 0.479        | 31.9 (29.1–35.2)            |
| Upper Murray (COP)       | COP        | 16        | 0.133        | 0.297        | 118.7 (102.2–141.1)         |
| Lachlan (LAC)            | LRT        | 8         | 0.057        | 0.672        | 18.1 (15.3–21.8)            |

632

633 Table 2. Results of multiple matrix regression with randomisation (MMRR) tests for the  
 634 relationship between pairwise genetic distance ( $F_{ST}$ ) and geographic distance, catchment  
 635 membership, number of in-stream barriers and environmental distances. Pairwise  
 636 environmental distances between each site were calculated as Euclidean distance for each  
 637 environmental variable and principal component (PC) described in Brauer *et al.* (2016). *P*-  
 638 values <0.0001 are indicated in bold.

| Model | Variable           | Coefficient | 95%CI          | <i>P</i> -value | <i>R</i> <sup>2</sup> | Model <i>P</i> -value |
|-------|--------------------|-------------|----------------|-----------------|-----------------------|-----------------------|
|       | Distance           | 0.108       | 0.004- 0.213   | 0.3340          | 0.014                 |                       |
|       | Catchment          | 0.449       | 0.336- 0.562   | <b>0.0001</b>   | 0.170                 |                       |
|       | Barriers           | 0.548       | 0.458- 0.639   | <b>0.0001</b>   | 0.322                 |                       |
|       | TempPC1            | -0.130      | -0.233- -0.028 | 0.2465          | 0.021                 |                       |
|       | TempPC2            | 0.180       | 0.077- 0.282   | 0.1443          | 0.039                 |                       |
|       | CATCOLDQRAIN       | 0.098       | -0.007- 0.202  | 0.3813          | 0.011                 |                       |
|       | CATDRYQRAIN        | -0.061      | -0.170- 0.043  | 0.5515          | 0.004                 |                       |
|       | STRWETQRAIN        | -0.058      | -0.162- 0.046  | 0.5496          | 0.004                 |                       |
|       | FlowPC1            | -0.053      | -0.158- 0.051  | 0.6698          | 0.003                 |                       |
|       | FlowPC2            | -0.125      | -0.227- -0.023 | 0.3520          | 0.019                 |                       |
|       | CDI                | 0.037       | -0.068- 0.142  | 0.6571          | 0.002                 |                       |
|       | FRDI               | -0.087      | -0.190- 0.015  | 0.4603          | 0.009                 |                       |
|       | TopoPC1            | -0.121      | -0.225- -0.017 | 0.2368          | 0.017                 |                       |
|       | TopoPC2            | 0.021       | -0.083- 0.125  | 0.8644          | 0.001                 |                       |
|       | Catchment+Barriers |             |                |                 | 0.358                 | <b>0.0001</b>         |
|       | Catchment          | 0.725       | 0.374- 1.076   | <b>0.0045</b>   |                       |                       |
|       | Barriers           | 0.462       | 0.365- 0.560   | <b>0.0001</b>   |                       |                       |

639

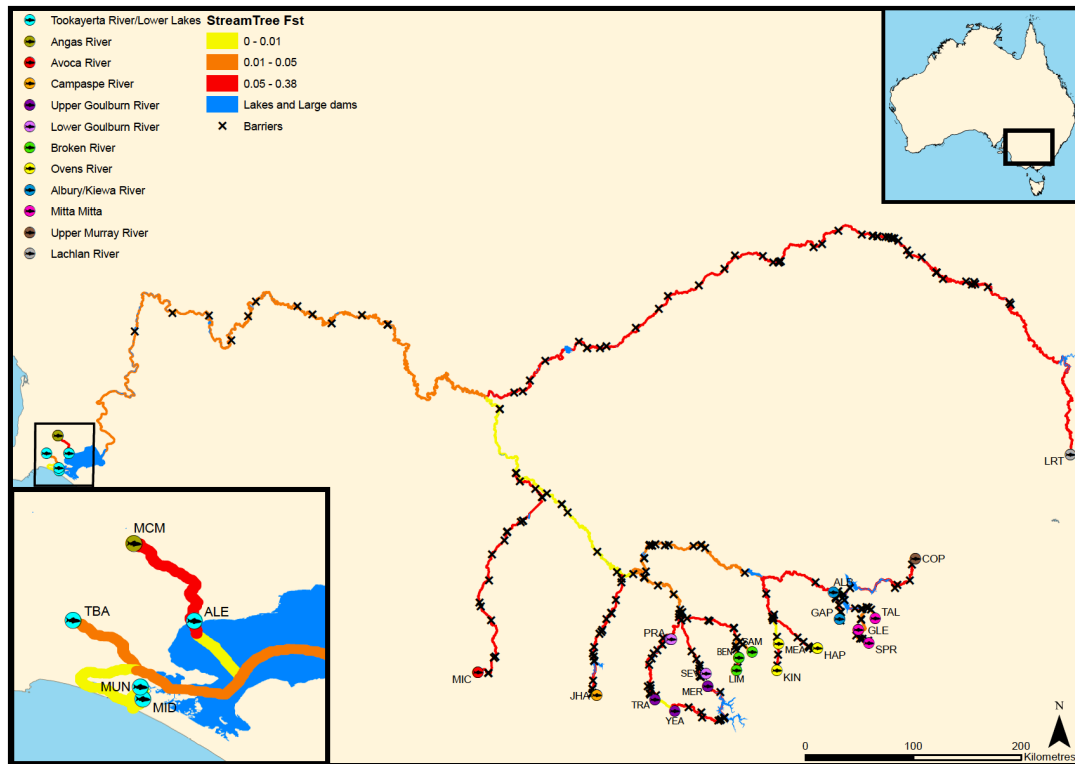

640

641 Figure 1. *Nannoperca australis* sampling locations in the Murray-Darling Basin (MDB).

642 Stream sections are colour coded according to  $F_{ST}$  estimated using the *StreamTree* model

643 (Kalinowski *et al.* 2008). Cross markers represent the location of artificial in-stream barriers.

644



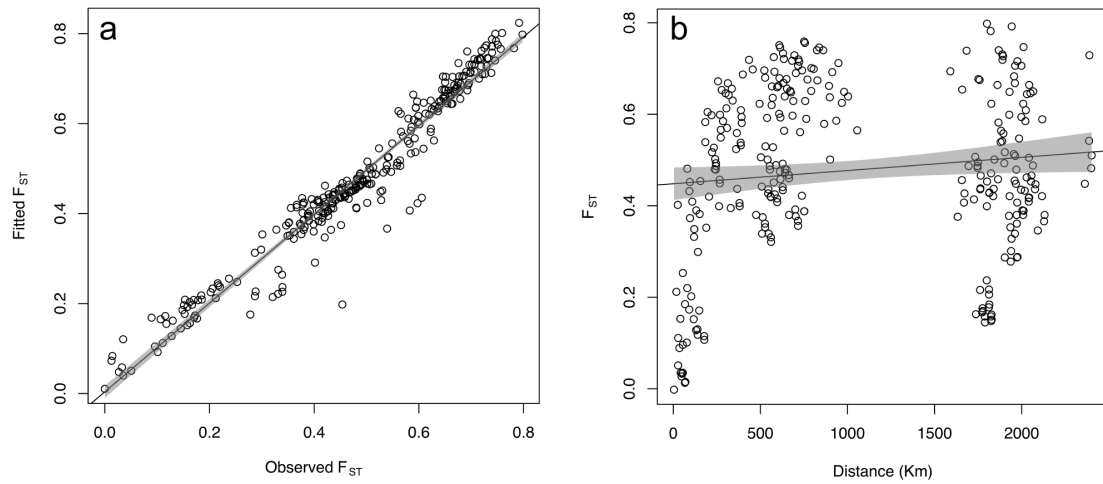

645

646 Figure 2. Plots of a) *StreamTree* analyses and b) isolation by distance (IBD) for *Nannoperca*

647 *australis* in the MDB. The *StreamTree* plot compares fitted  $F_{ST}$  based on the *StreamTree*

648 model with observed pairwise  $F_{ST}$  values ( $R^2=0.947$ ,  $\beta=0.986$  [0.959- 1.012 95%CI],

649  $P<2\times 10^{-16}$ ). The IBD plot depicts the relationship between pairwise  $F_{ST}$  and riverine distance

650 between sampling sites ( $R^2=0.0139$ ,  $\beta=0.108$  [0.004- 0.212 95%CI],  $P=0.343$ ). Shaded area

651 represents the 95% confidence interval.

652

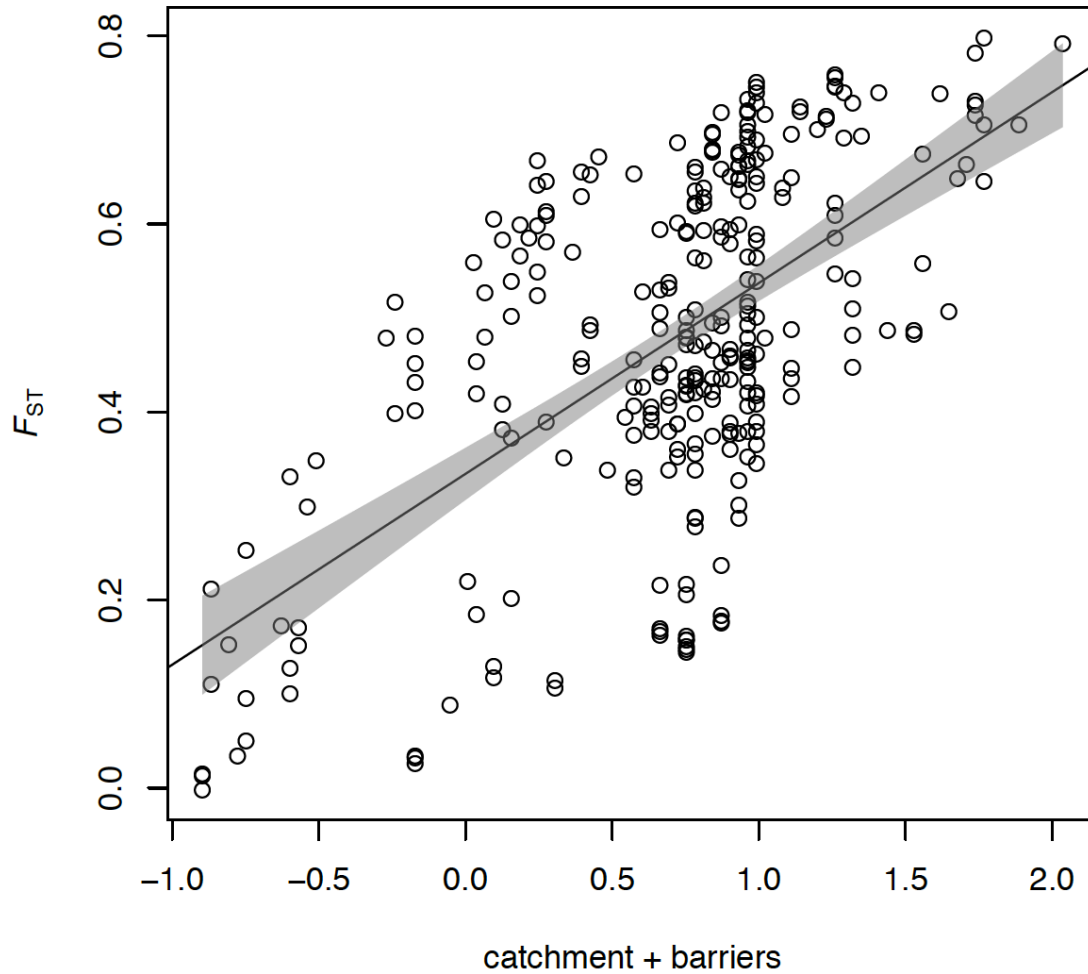

653

654 Figure 3. Multiple matrix regression with randomisation (MMRR) plot for the combined  
655 effects of natural stream hierarchy (model matrix of catchment membership) and number of  
656 barriers on  $F_{ST}$  ( $R^2=0.358$ ,  $\beta_{\text{catchment}}=0.725$  [0.374- 1.076 95%CI],  $\beta_{\text{barriers}}=0.462$  [0.365- 0.560  
657 95%CI],  $P<0.0001$ ). Shaded area represents the 95% confidence interval.

658

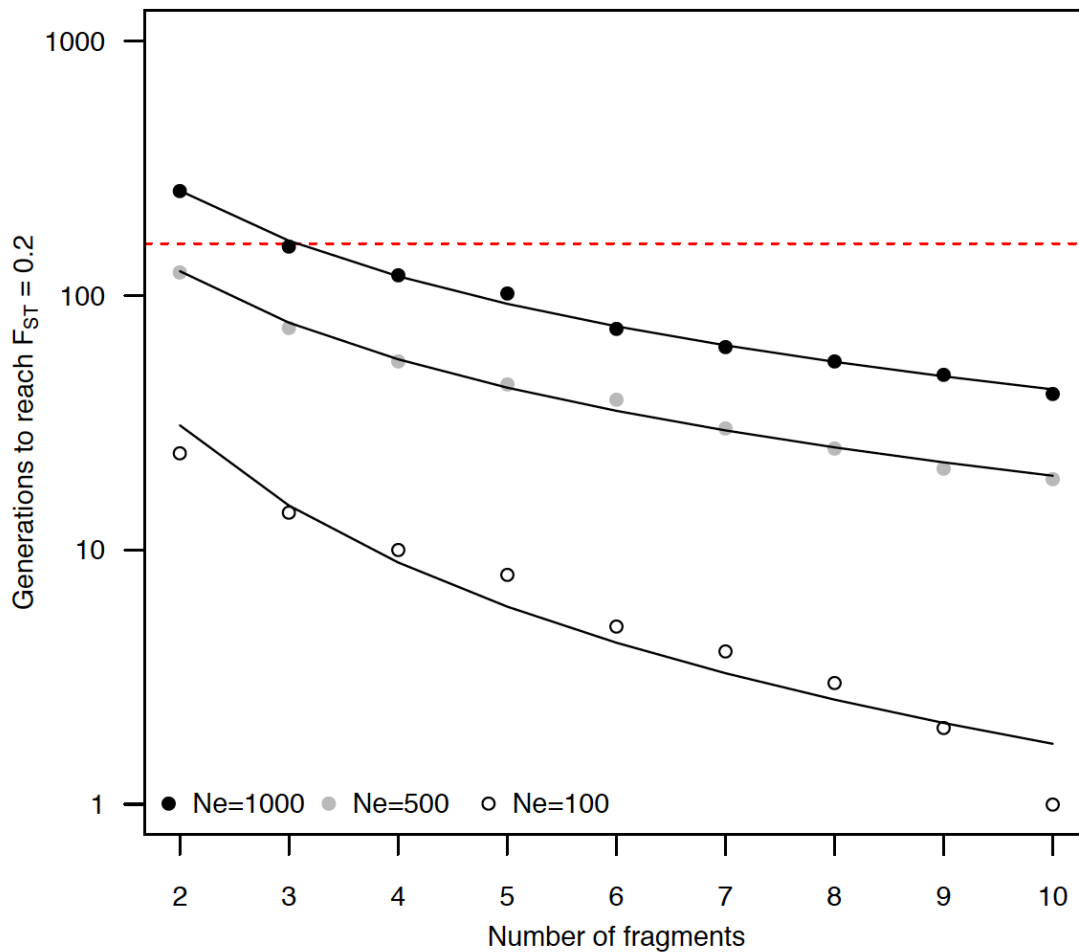

659

660 Figure 4. Number of generations (log scale) for global  $F_{ST}$  to reach 0.2 with increasing levels  
661 of habitat fragmentation for simulated *N. australis* metapopulations of  $N_e=1000$ ,  $N_e=500$  and  
662  $N_e=100$ . Simulations were based on a stepping stone model assuming equal  $N_e$  for each  
663 sub-population and were allowed to run for 20,000 generations with a migration rate of 0.5  
664 between adjacent demes before 300 generations with no migration. Red dashed line  
665 indicates the approximate number of generations since construction of in-stream barriers  
666 began in the MDB (160 generations).

667
